# Supplementary material for: Current promoted micro-annealing in anodic TiO2tube arrays and its application in sensitized solar cells
Source: Royal Society of Chemistry journal article supplement (doi:10.1039/c2ta00810f), 2012-10-24
Supplement: c2ta00810f.pdf [file c2ta00810f.pdf]

## SUPPORTING INFORMATION for Current Promoted Micro-Annealing in Anodic TiO<sub>2</sub> Tube Arrays and Its Application in Sensitized Solar Cells

Yan Xiong,<sup>a</sup> Liang Tao,<sup>b</sup> Hong Liu<sup>\*ab</sup> and Wenzhong Shen<sup>\*\*ab</sup>

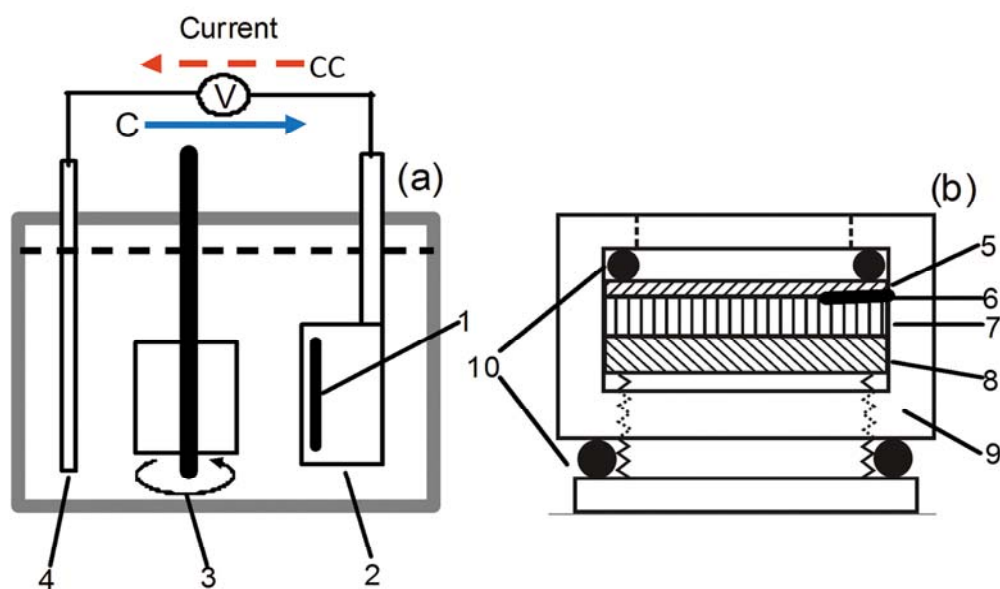

**Figure S1** Schematic diagram of CPMA experiments: (a) side view of the setup: (1) Ti sheet, (2) sample chamber, (3) stirrer, (4) Cu electrode, (C) anodization mode, (CC) current injection mode; (b) sample chamber: (5) Ti sheet, (6) thermocouple, (7) copper electrode, (8) copper plate, (9) outer shell, (10) rubber O-ring.

The anodization of Ti was carried out in a two-electrode system shown in Figure S1. The Ti was mounted in a sample chamber made with Teflon. The polarity of the two electrodes could be switched in the anodization and current injection, respectively. A type K thermocouple was located beneath the Ti sheet to measure the temperature during the experiments.

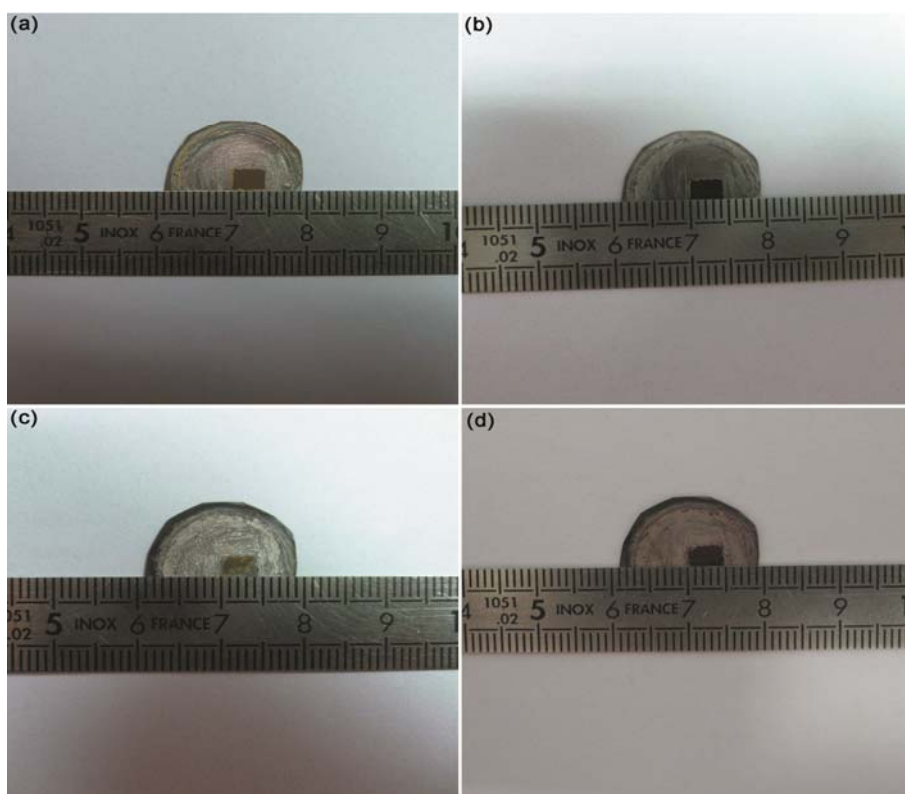

**Figure S2** Digital images of TiO<sub>2</sub> NTs at different fabricating processes: (a) TiO<sub>2</sub> NTs grown on a Ti substrate after the secondary anodization, (b) TiO<sub>2</sub> NTs treated by HF aqueous solution, (c) crystallized TiO<sub>2</sub> NTs after the current annealing, (d) sensitized TiO<sub>2</sub> NTs with N719 solution.

Highly ordered TiO<sub>2</sub> NTs were prepared by anodization of a Ti sheet. The second anodization was performed at 160 V/160±5 V at 5 °C for 10 min. After being rinsed and aired as shown in Figure S2(a), the anodized Ti sheet was treated by HF. Obviously, as shown in Figure S2(b), the color of the TiO<sub>2</sub> NTs turned to black from yellow after HF treatment, which indicates the fluorination reaction occurred. After the current annealing, the TiO<sub>2</sub> NTs were crystallized into anatase and became translucent as shown in Figure S2(c). Sensitized by N719 solution for 12 h, the TiO<sub>2</sub> NTs looked deep-carmin [see Figure S2(d)] due to the tubes and their secondary structures were full of dye molecule.

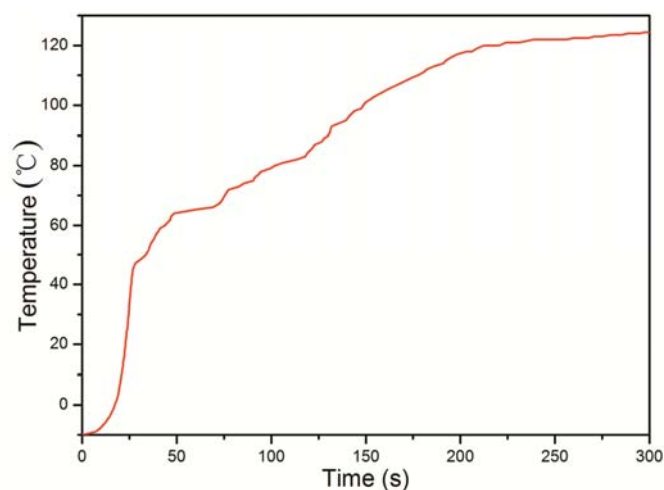

**Figure S3** TiO<sub>2</sub> NTs sample temperature during current annealing in medium solution.

The typical temperature inside the sample chamber is shown in Figure S3, which was measured by a thermocouple implanted in the chamber below the Ti sheet. The sample temperature curve shows that the maximum temperature of the sample is less than 130 °C, while the low-temperature micro-annealing is happening during the process.

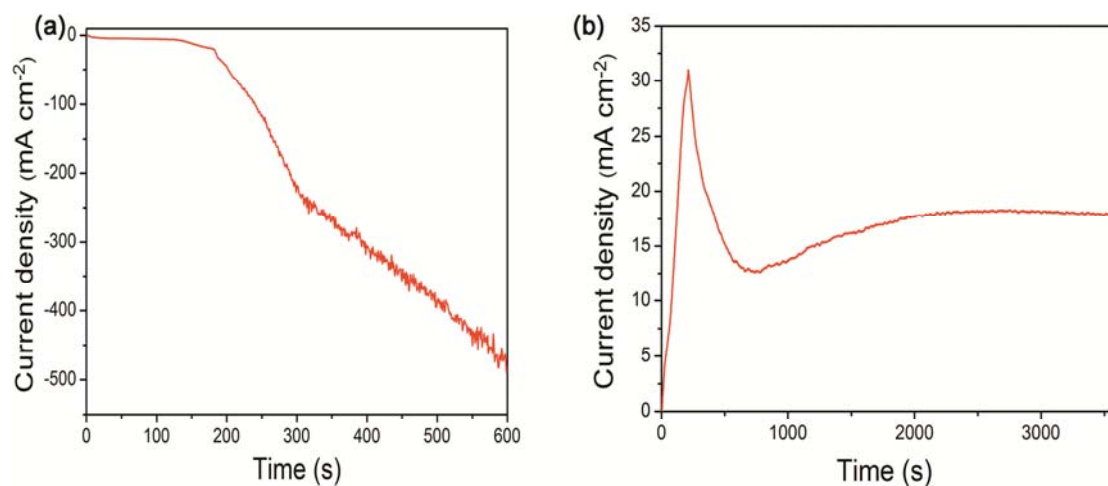

**Figure S4** J-t curves during different processes of TiO<sub>2</sub>: (a) during inversed current injection, at 300 V under -10 °C; (b) during spontaneous micro-annealing process, at 210 V under 5 °C.

The J-t curves were recorded during the anodization and current annealing experiments. Figure S4(a) has given the typical J-t characteristics during the current treatment. It can be seen that very strong current intensity has resulted during the short treatment. For comparison, Figure S4(b) has given the typical J-t curve during the spontaneous micro-annealing, in which the current was much lower.

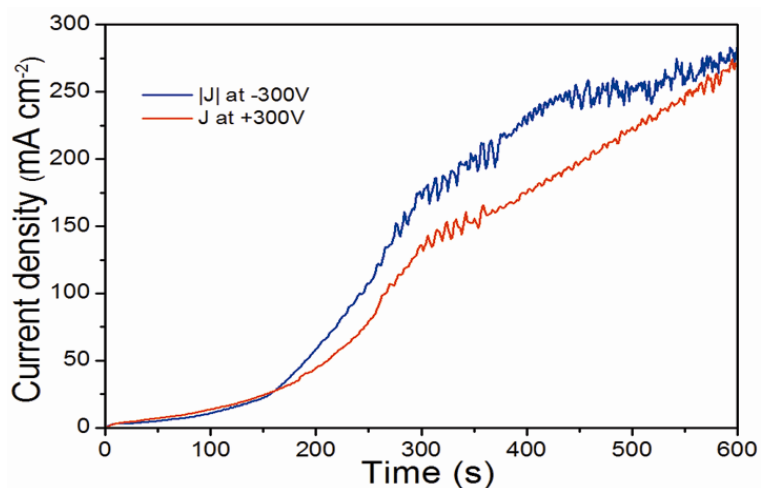

**Figure S5** J-t curves with high potential applied from different directions on the electrochemical pool,  $t_{\text{total}} = 300\text{s}$ , plus 300s ramping at 1V/s.

To investigate possible influence from the semiconducting nature of the  $\text{TiO}_2$  layer and  $\text{Ti}/\text{TiO}_2$  interface on the conductance, +300V was also applied on the sample chamber and the J-t curve was recorded for comparison with the result from the inversed current injection of -300V. As shown in Figure S5, apparently there is no significant reduction if the sample chamber voltage was negatively biased compared to the case with positively biased voltage. The current was even a bit higher when the sample was negatively biased than the way vice versa.

**Table S1** Data of photovoltaic characteristics of DSSCs in the work. <sup>a</sup>

|                      | growth and chemical treatment conditions | J <sub>sc</sub> /<br>mA cm <sup>-2</sup> | V <sub>oc</sub> /<br>V | FF<br>(%) | η<br>(%) |
|----------------------|------------------------------------------|------------------------------------------|------------------------|-----------|----------|
| Plain cell           | CV <sup>b</sup> , -5 °C                  | 7.71                                     | 0.47                   | 40.48     | 1.34     |
|                      | CV, -10 °C                               | 11.24                                    | 0.52                   | 35.82     | 2.05     |
| HF treatment         | CV, 0.05%HF, -10 °C                      | 12.70                                    | 0.51                   | 33.69     | 2.15     |
|                      | CV, 0.10%HF, -10 °C                      | 15.93                                    | 0.56                   | 33.58     | 2.74     |
|                      | CV, 0.15%HF, -10 °C                      | 12.44                                    | 0.53                   | 34.34     | 2.38     |
|                      | CV, 0.20%HF, -10 °C                      | 7.88                                     | 0.57                   | 32.18     | 2.03     |
|                      | CV, 0.35%HF, -10 °C                      | 6.80                                     | 0.56                   | 30.76     | 1.38     |
| Modulated conditions | MV <sup>c</sup> , 0.10%HF, -10 °C        | 13.02                                    | 0.66                   | 45.30     | 3.51     |
|                      | MV,0.10%HF, 450 °C                       | 10.25                                    | 0.61                   | 38.60     | 2.25     |

<sup>a</sup> All data were acquired in back-side illuminated DSSCs.

<sup>b</sup> constant voltage

<sup>c</sup> modulated voltage

Data of the DSSCs were included in the Table S1 in the electronic supplementary information. To avoid impacts from uncertain factors and make sure the experimental results are systematic and repeatable, each condition was tested by various samples. The values under identical conditions are quite close, showing that the experimental results are suitably reproducible.
